# Supplementary material for: Effect of fractal silver electrodes on charge collection and light distribution in semiconducting organic polymer films
Source: Royal Society of Chemistry journal article supplement (doi:10.1039/c4ta03204g), 2014-08-21
Supplement: c4ta03204g1.pdf [file c4ta03204g1.pdf]

## Supporting Information (3 pages)

### **Effect of Fractal Silver Electrodes on Charge Collection and Light Distribution in Semiconducting Organic Polymer Films**

Rachel L. Chamousis<sup>[a]</sup>, Lilian Chang<sup>[b]</sup>, William J Watterson,<sup>[c]</sup> Rick Montgomery,<sup>[c]</sup> Richard Taylor<sup>[c]</sup>, Adam J. Moule<sup>[b]</sup>, Sean Shaheen,<sup>[d]</sup> Boaz Ilan,<sup>[e]</sup> Dr. Jao van de Lagemaat,<sup>[f]</sup> Frank E. Osterloh\*<sup>[a]</sup>

<sup>a</sup> Department of Chemistry, University of California, Davis, One Shields Avenue, Davis, CA 95616 (USA), Fax: (+1)5307528995, Email: fosterloh@ucdavis.edu

<sup>b</sup> Department of Chemical Engineering and Materials Science, University of California, Davis, One Shields Avenue, Davis, CA 95616 (USA)

<sup>c</sup> Department of Physics, University of Oregon, Eugene, 1585 E. 13th Ave., Eugene, OR 97403 (USA)

<sup>d</sup> Dept. of Electrical, Computer, and Energy Engineering, Renewable and Sustainable Energy Institute, University of Colorado at Boulder, UCB 425, Boulder, CO 80309

<sup>e</sup> School of Natural Sciences, University of California, Merced, 5200 North Lake Road, Merced, CA 95343

<sup>f</sup> Chemical and Materials Sciences Center, National Renewable Energy Laboratory, Golden, CO 80401

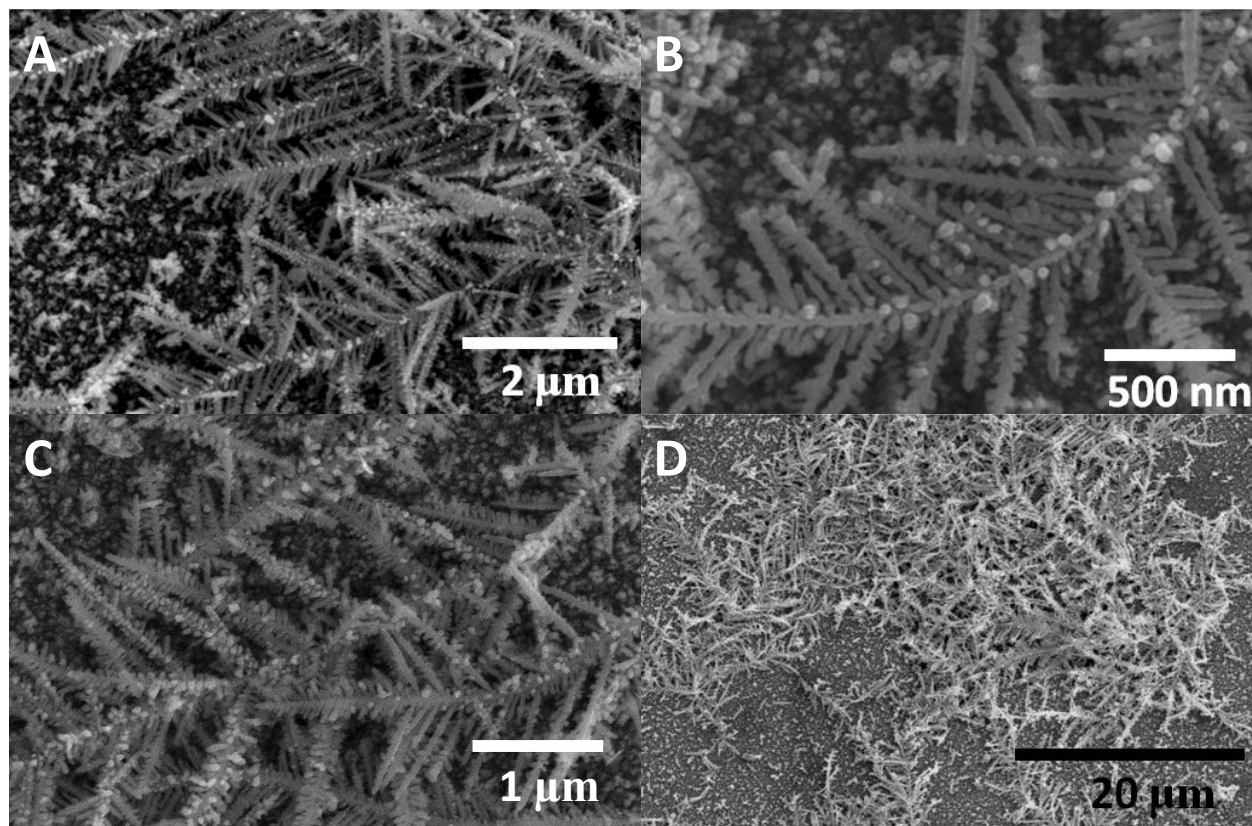

**Figure S1.** Scanning electron microscopy images of fractal silver on FTO obtained by electrodeposition at  $-0.85$  V vs NHE for 300 s from an aqueous solution of  $0.005$  M  $\text{Ag}_2\text{SO}_4$ ,  $0.01$  M  $\text{H}_2\text{SO}_4$ , and  $0.5$  M  $\text{Na}_2\text{SO}_4$ .

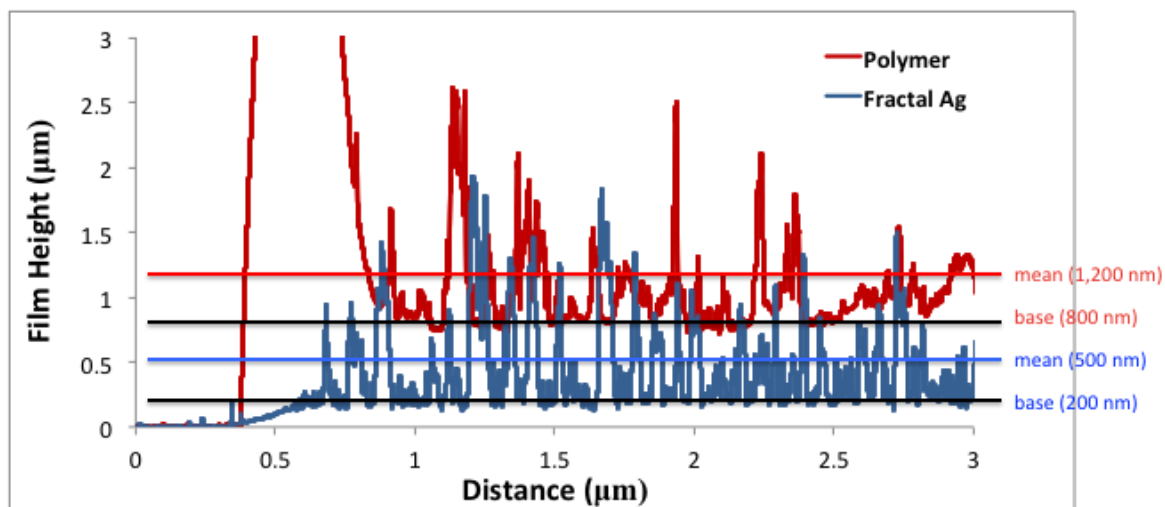

**Figure S2.** Representative profilometer traces for non-coated and polymer coated silver fractal films. Polymer thickness (600 nm) was calculated by subtracting the baseline of the fractal silver (200 nm) from the baseline of the polymer-coated film (800 nm). Mean fractal heights are also shown.
